# Supplementary material for: Landsat near-infrared (NIR) band and ELM-FATES sensitivity to forest disturbances and regrowth in the Central Amazon
Source: Copernicus journal article supplement (doi:10.5194/bg-17-6185-2020), 2020-12-09
Supplement: Supplementary file 1 [file bg-17-6185-2020-supplement.pdf]

Supplement of Biogeosciences, 17, 6185–6205, 2020  
<https://doi.org/10.5194/bg-17-6185-2020-supplement>  
© Author(s) 2020. This work is distributed under  
the Creative Commons Attribution 4.0 License.

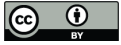

*Supplement of*

## **Landsat near-infrared (NIR) band and ELM-FATES sensitivity to forest disturbances and regrowth in the Central Amazon**

**Robinson I. Negrón-Juárez et al.**

*Correspondence to:* Robinson I. Negrón-Juárez (robinson.inj@lbl.gov)

The copyright of individual parts of the supplement might differ from the CC BY 4.0 License.

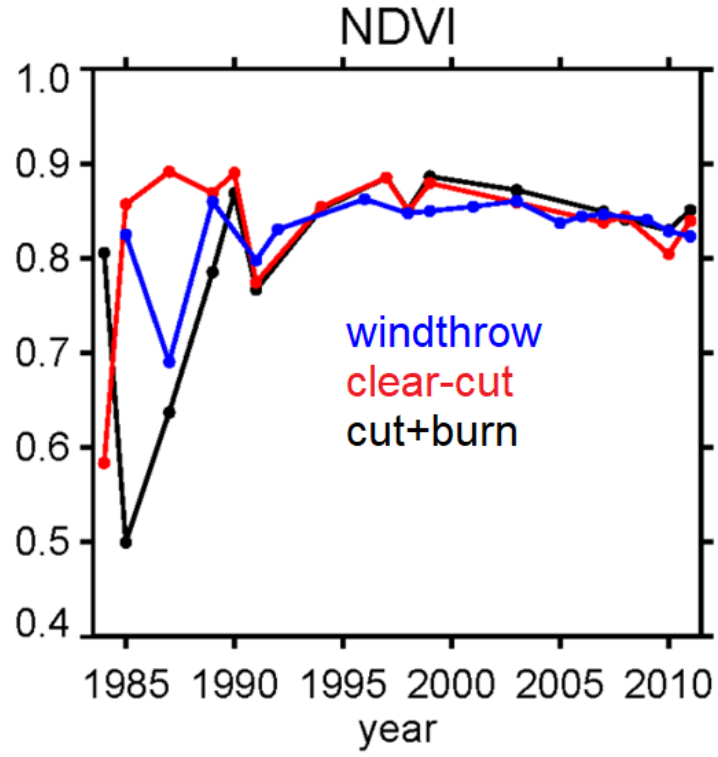

**Supplementary Figure 1.** NDVI for the windthrows, clear-cut and cut+burn sites (the standard deviation for each cell was removed for clarity).
